# Supplementary material for: Maternal Chromium Restriction Leads to Glucose Metabolism Imbalance in Mice Offspring through Insulin Signaling and Wnt Signaling Pathways
Source: PubMed Central journal article supplement (PMC5085791; doi:10.3390/ijms17101767), 2016-10-22
Supplement: ijms-17-01767-s001.pdf [file ijms-17-01767-s001.pdf]

# Supplementary Materials: Maternal Chromium Restriction Leads to Glucose Metabolism Imbalance in Mice Offspring through Insulin Signaling and Wnt Signaling Pathways

Qian Zhang, Xiaofang Sun, Xinhua Xiao, Jia Zheng, Ming Li, Miao Yu, Fan Ping, Zhixin Wang, Cuijuan Qi, Tong Wang and Xiaojing Wang

**Table S1.** The most enrichment GO terms ( $p < 0.001$ ).

| Term                                                                                         | Count | Fold Enrichment | $p$ -Value            | Catalogue           |
|----------------------------------------------------------------------------------------------|-------|-----------------|-----------------------|---------------------|
| transcription                                                                                | 60    | 1.8330          | $3.07 \times 10^{-6}$ | Biology Process     |
| regulation of transcription                                                                  | 70    | 1.7016          | $4.52 \times 10^{-6}$ | Biology Process     |
| regulation of RNA metabolic process                                                          | 51    | 1.8554          | $1.66 \times 10^{-5}$ | Biology Process     |
| regulation of transcription, DNA-dependent                                                   | 50    | 1.8476          | $2.32 \times 10^{-5}$ | Biology Process     |
| positive regulation of transcription, DNA-dependent                                          | 21    | 2.7328          | $8.75 \times 10^{-5}$ | Biology Process     |
| positive regulation of RNA metabolic process                                                 | 21    | 2.7132          | $9.71 \times 10^{-5}$ | Biology Process     |
| response to insulin stimulus                                                                 | 8     | 7.3404          | $9.90 \times 10^{-5}$ | Biology Process     |
| positive regulation of transcription from RNA polymerase II promoter                         | 19    | 2.8731          | $1.14 \times 10^{-4}$ | Biology Process     |
| insulin receptor signaling pathway                                                           | 6     | 11.6004         | $1.41 \times 10^{-4}$ | Biology Process     |
| regulation of transcription from RNA polymerase II promoter                                  | 26    | 2.2849          | $1.76 \times 10^{-4}$ | Biology Process     |
| positive regulation of nitrogen compound metabolic process                                   | 23    | 2.3671          | $2.91 \times 10^{-4}$ | Biology Process     |
| tube development                                                                             | 15    | 3.0758          | $3.88 \times 10^{-4}$ | Biology Process     |
| positive regulation of nucleobase, nucleoside, nucleotide and nucleic acid metabolic process | 22    | 2.3352          | $4.87 \times 10^{-4}$ | Biology Process     |
| positive regulation of transcription                                                         | 21    | 2.3933          | $5.05 \times 10^{-4}$ | Biology Process     |
| positive regulation of cellular biosynthetic process                                         | 23    | 2.2556          | $5.60 \times 10^{-4}$ | Biology Process     |
| positive regulation of biosynthetic process                                                  | 23    | 2.2353          | $6.34 \times 10^{-4}$ | Biology Process     |
| positive regulation of gene expression                                                       | 21    | 2.3296          | $7.06 \times 10^{-4}$ | Biology Process     |
| ventricular cardiac muscle cell differentiation                                              | 4     | 19.6852         | $9.10 \times 10^{-4}$ | Biology Process     |
| nucleoplasm part                                                                             | 21    | 2.4608          | $3.34 \times 10^{-4}$ | Cellular Components |
| nucleoplasm                                                                                  | 23    | 2.3082          | $3.84 \times 10^{-4}$ | Cellular Components |
| transcription regulator activity                                                             | 46    | 2.2728          | $2.00 \times 10^{-7}$ | Molecular Function  |
| DNA binding                                                                                  | 55    | 1.8401          | $6.91 \times 10^{-6}$ | Molecular Function  |
| transcription factor activity                                                                | 29    | 2.2268          | $9.76 \times 10^{-5}$ | Molecular Function  |
| zinc ion binding                                                                             | 58    | 1.6418          | $9.96 \times 10^{-5}$ | Molecular Function  |
| transition metal ion binding                                                                 | 68    | 1.5536          | $1.01 \times 10^{-4}$ | Molecular Function  |
| transcription factor binding                                                                 | 15    | 3.1035          | $3.51 \times 10^{-4}$ | Molecular Function  |

**Table S2.** Most enrichment pathways by KEGG ( $p < 0.001$ ).

| Pathway ID | Pathway                   | Count | Genes                                                                                                                                | Fold Enrichment | p-Value               |
|------------|---------------------------|-------|--------------------------------------------------------------------------------------------------------------------------------------|-----------------|-----------------------|
| mmu04310   | Wnt signaling pathway     | 15    | <i>Wnt5a, Ppp2r1a, Tcf7, Ppard, Ppp2r5b, Apc2, Crebbp, Skp1a, Tcf7l2, Porcn, Tcf7l1, Ctnnb1, Rac3, Ppp3cb, Frat1</i>                 | 4.5484          | $1.81 \times 10^{-5}$ |
| mmu05215   | Prostate cancer           | 11    | <i>Akt1, Tcf7, Ar, Creb3, Crebbp, Foxo1, Pik3ca, Ins1, Pik3r3, Tcf7l2, Tcf7l1</i>                                                    | 5.5659          | $2.20 \times 10^{-5}$ |
| mmu04520   | Adherens junction         | 10    | <i>Tcf7, Rac3, Crebbp, Lmo7, Cdh1, Ptpn1, Insr, Tcf7l2, Iqgap1, Tcf7l1</i>                                                           | 5.9920          | $3.45 \times 10^{-5}$ |
| mmu04910   | Insulin signaling pathway | 13    | <i>Akt1, Irs2, Socs2, Slc2a4, Inpp5k, Tsc2, Foxo1, Pik3ca, Ptpn1, Ins1, Pik3r3, Pck2, Insr</i>                                       | 4.2899          | $4.00 \times 10^{-5}$ |
| mmu04930   | Type II diabetes mellitus | 8     | <i>Irs2, Socs2, Slc2a4, Cacna1g, Pik3ca, Ins1, Pik3r3, Insr</i>                                                                      | 7.4350          | $7.90 \times 10^{-5}$ |
| mmu05213   | Endometrial cancer        | 8     | <i>Akt1, Tcf7, Apc2, Pik3ca, Cdh1, Pik3r3, Tcf7l2, Tcf7l1</i>                                                                        | 7.0061          | $1.17 \times 10^{-4}$ |
| mmu05200   | Pathways in cancer        | 19    | <i>Wnt5a, Ar, Ppard, Tcf7, Apc2, Rxra, Crebbp, Itga2, Foxo1, Cdh1, Tcf7l2, Tcf7l1, Arnt, Akt1, Ccdc6, Rac3, Pik3ca, Rarb, Pik3r3</i> | 2.6788          | $1.92 \times 10^{-4}$ |
| mmu05216   | Thyroid cancer            | 6     | <i>Ccdc6, Tcf7, Rxra, Cdh1, Tcf7l2, Tcf7l1</i>                                                                                       | 9.4220          | $3.53 \times 10^{-4}$ |

Table S3. Real-time PCR primers.

| Transcripts                                 | ID           | Primer Direction | Primer Sequence                 | Product Length |
|---------------------------------------------|--------------|------------------|---------------------------------|----------------|
| <i>Socs2</i>                                | NM_007706    | F                | 5'-TTAGAGATAGTTCGCATTCAGA-3'    | 79             |
|                                             |              | R                | 5'-TCAATCCGCAGGTTAGTC-3'        |                |
| <i>Akt1</i>                                 | NM_009652    | F                | 5'-CAGTTTGAGACCACACAT-3'        | 75             |
|                                             |              | R                | 5'-GCGTCAGTCCTTAATAGTT-3'       |                |
| <i>Irs2</i>                                 | NM_001081212 | F                | 5'-AGGACTATGGAGACATTGAG-3'      | 75             |
|                                             |              | R                | 5'-GCATGTAGCCATCATCTG-3'        |                |
| <i>Pik3ca</i>                               | NM_008839    | F                | 5'-TGTGGCATCTGAGTATCT-3'        | 132            |
|                                             |              | R                | 5'-TGTGGCATCTGAGTATCT-3'        |                |
| <i>Tcf7l2</i>                               | NM_001142918 | F                | 5'-GGACACCACTCAACAATG-3'        | 76             |
|                                             |              | R                | 5'-TACAGCAAGCAACCTCTAA-3'       |                |
| <i>Wnt5a</i>                                | NM_009524    | F                | 5'-GAGTATCGTCCTTCATTGC-3'       | 101            |
|                                             |              | R                | 5'-TCCTGGTATTCGTGGTAG-3'        |                |
| <i>Ctnnb1</i><br>( <i>catenin, beta 1</i> ) | NM_007614    | F                | 5'-ATGGAGGAGATAGTAGAA-3'        | 98             |
|                                             |              | R                | 5'-AATGGAATGGTATTGAGT-3'        |                |
| <i>FoxO1</i>                                | NM_019739    | F                | 5'-CCTTGAGCAGCCTAATGT-3'        | 108            |
|                                             |              | R                | 5'-CGATGGACGGAATGAGAG-3'        |                |
| <i>G6pc</i>                                 | NM_008061    | F                | 5'-GAAGGATGGAGGAAGGAA-3'        | 77             |
|                                             |              | R                | 5'-TTGGTAATTCACCTGGAGATAG-3'    |                |
| <i>Ins1</i>                                 | NM_008386    | F                | 5'-GGAGGTACTTTGGACTAT-3'        | 79             |
|                                             |              | R                | 5'-GATGGTCTCTGATTATAGC-3'       |                |
| <i>Pck2 (Pepck)</i>                         | NM_028994    | F                | 5'-CCTCTGACAATCGTGCTA-3'        | 128            |
|                                             |              | R                | 5'-GTTATTATGTTCAATCCAACCTCTG-3' |                |
| <i>Slc2a4 (Glut4)</i>                       | NM_009204    | F                | 5'-TATGTTGCGGATGCTATG-3'        | 82             |
|                                             |              | R                | 5'-TTAGGAAGGTGAAGATGAAG-3'      |                |
| <i>Ptpn1 (Ptp1b)</i>                        | NM_011201    | F                | 5'-CCACGAACAGAGTCTAAT-3'        | 79             |
|                                             |              | R                | 5'-TGAGAGCAAGAAGAGTATT-3'       |                |

*Socs2*: suppressor of cytokine signaling 2; *Akt1*: Thymoma viral proto-oncogene 1; *Irs2*: insulin receptor substrate 2; *Pik3ca*: phosphatidylinositol 3-kinase, catalytic, alpha polypeptide; *Tcf7l2*: transcription factor 7 like 2; *Wnt5a*: wntless-type MMTV integration site family, member 5A; *Ctnnb1* (*catenin, beta 1*): catenin (cadherin associated protein), beta 1; *FoxO1*: forkhead box O1; *G6pc*: glucose-6-phosphatase, catalytic; *Ins1*: insulin 1; *Pck2 (Pepck)*: phosphoenolpyruvate carboxykinase 2; *Slc2a4 (Glut4)*: solute carrier family 2 member 4; *Ptpn1 (Ptp1b)*: protein tyrosine phosphatase, non-receptor type 1.

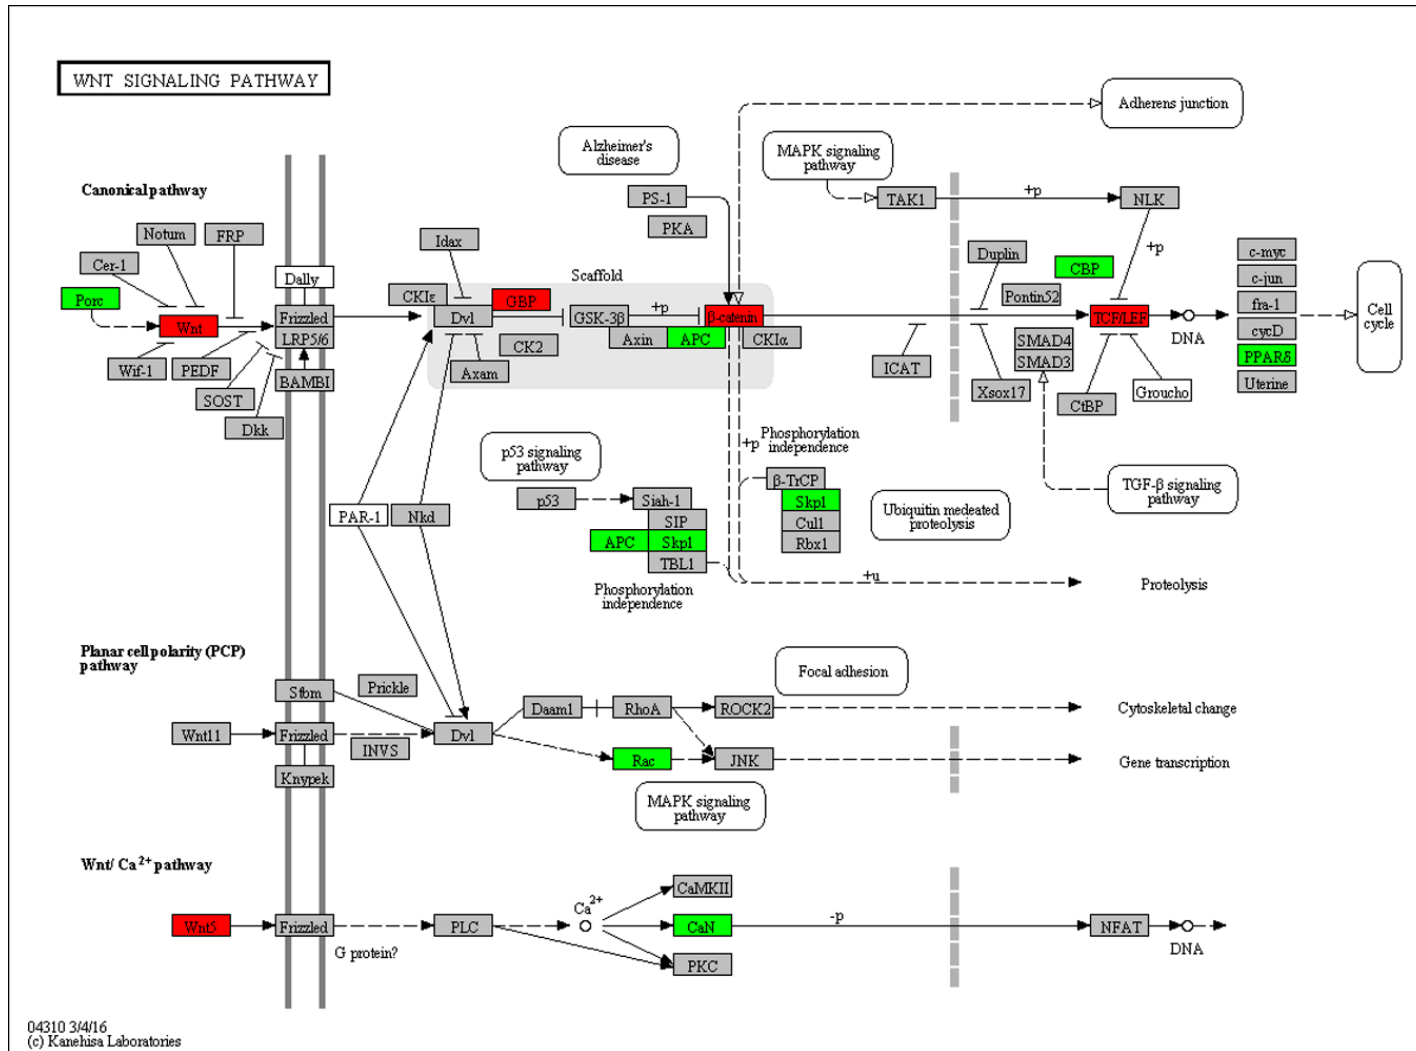

**Figure S1.** Wnt pathway. Red represents up-regulated; green represents down-regulated; grey represents no significant change. Arrows with dashed line show possible interaction of genes. Arrows with solid line show interaction of genes. T bars show inhibition of genes.

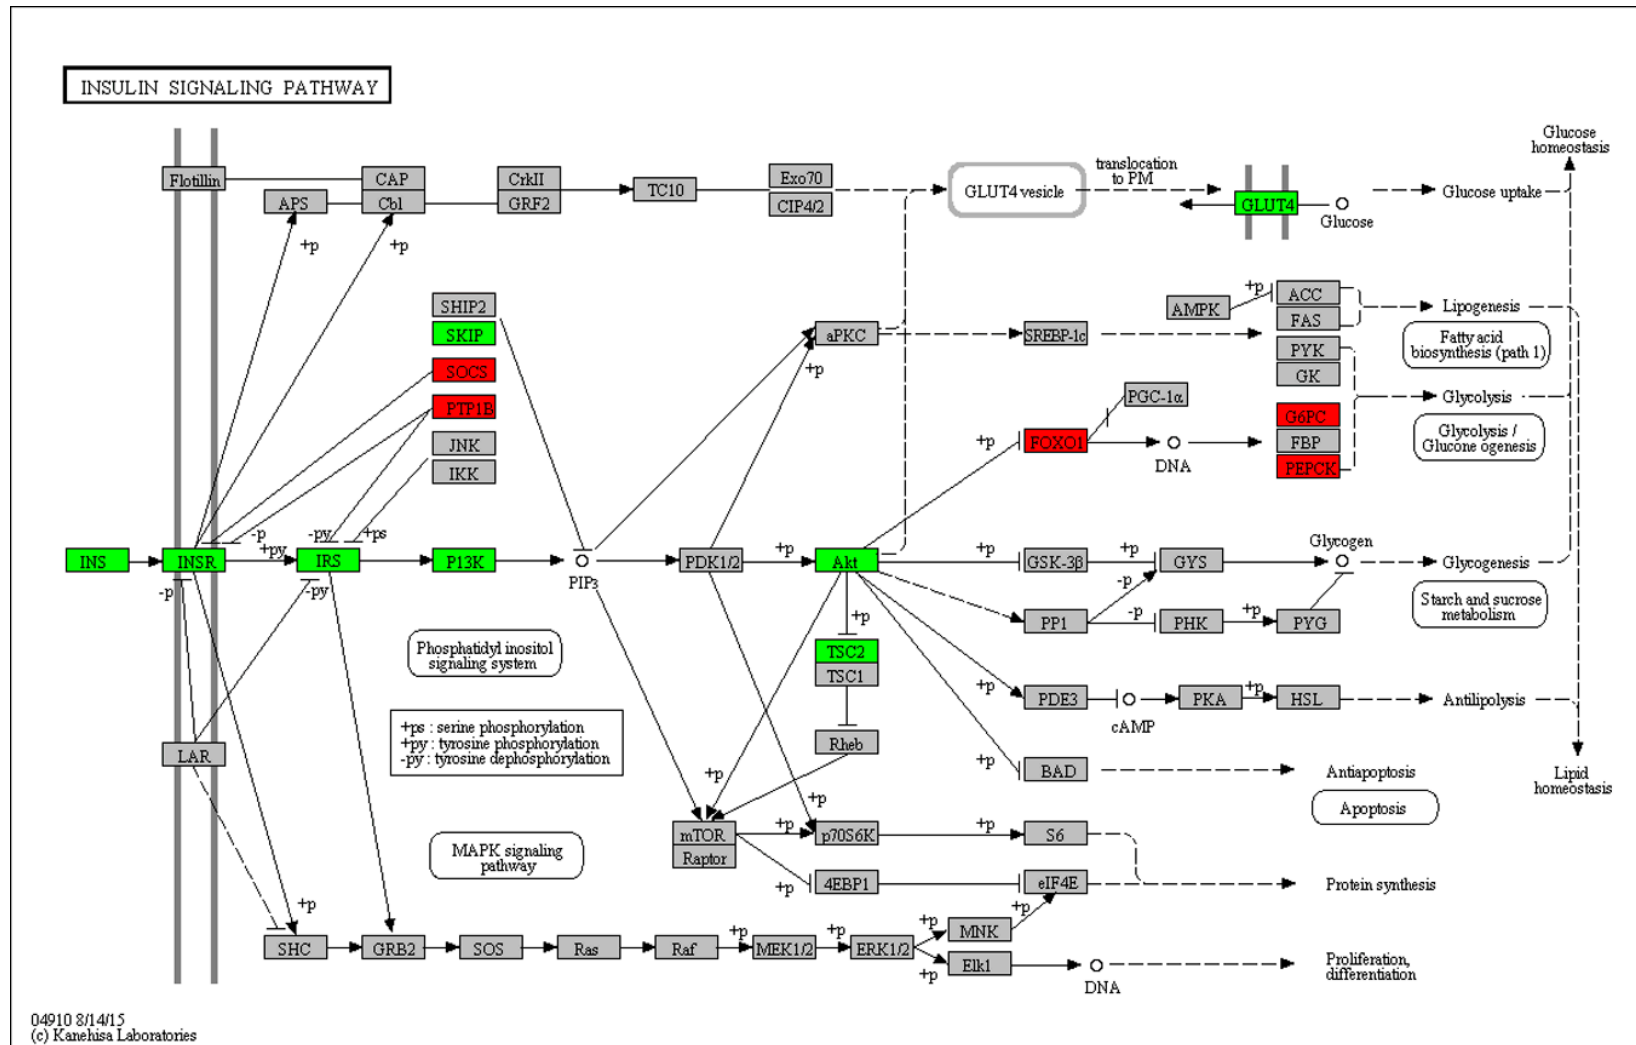

**Figure S2.** Insulin signaling pathway. Red represents up-regulated; green represents down-regulated; grey represents no significant change. Arrows with dashed line show possible interaction of genes. Arrows with solid line show interaction of genes. T bars show inhibition of genes.

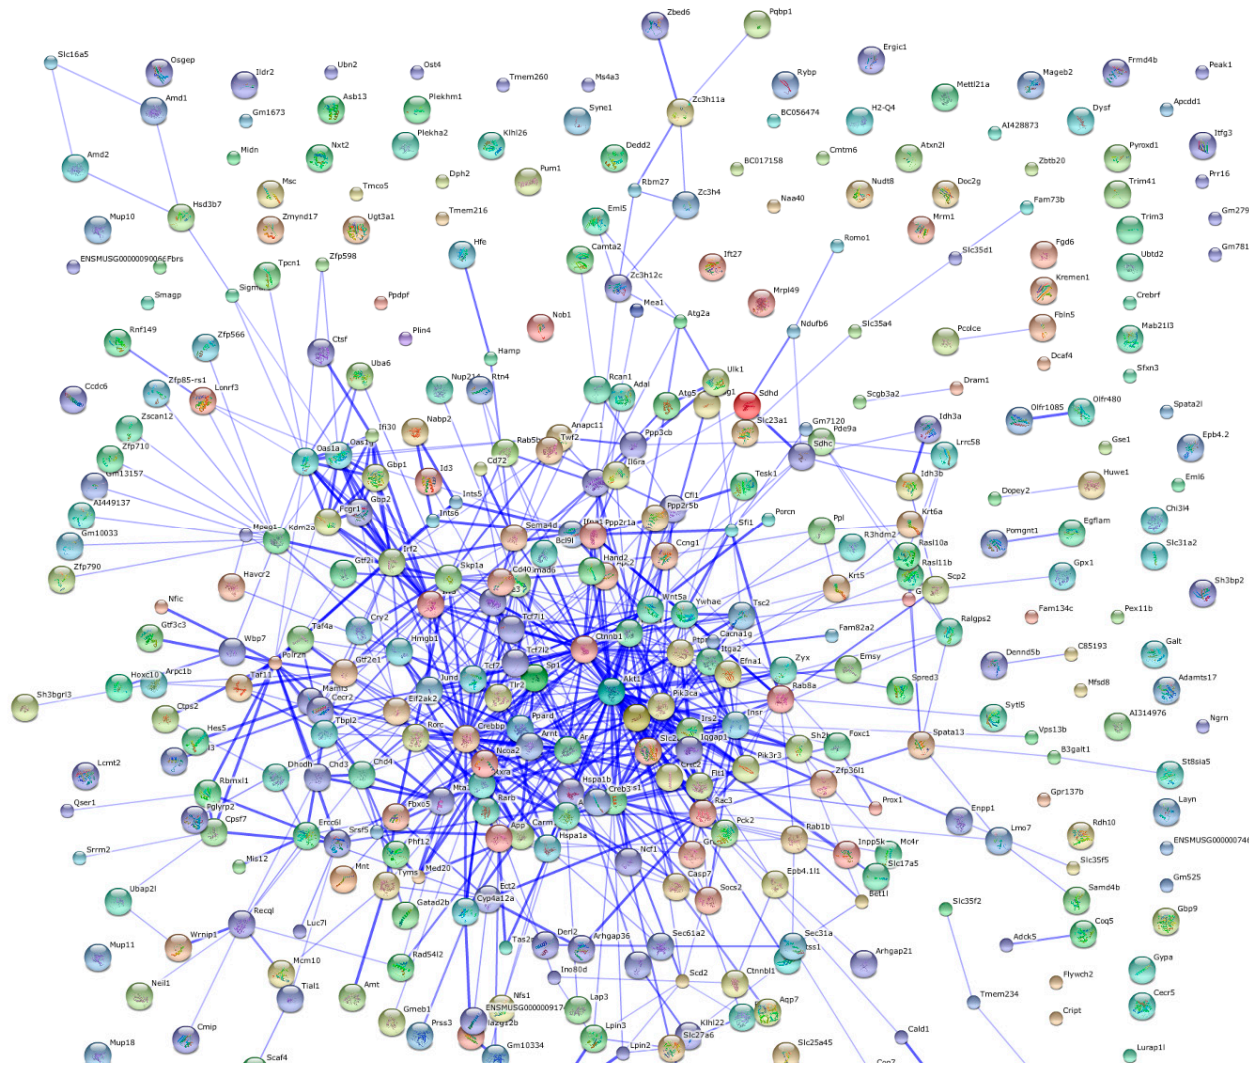

**Figure S3.** Interaction networks maps of differentially expressed genes. There were 13 nodes with  $\geq 10$  joint-edges in the map, including 190 joint-edges, which accounted for 88% of the total. Stronger associations are represented by thicker lines.

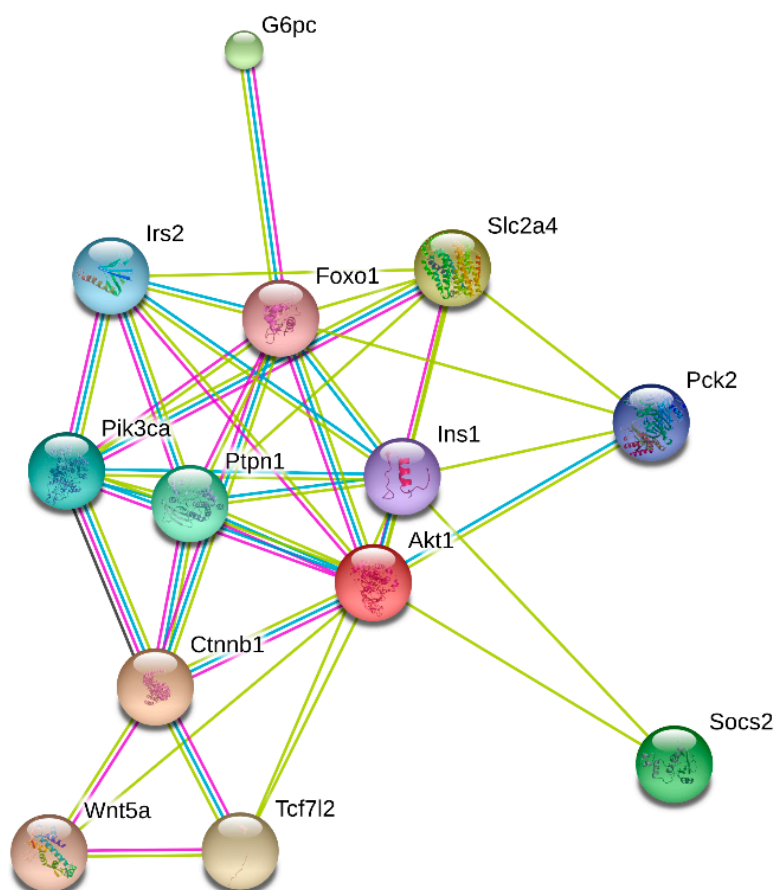

**Figure S4.** Interaction networks maps of differentially expressed genes in insulin signaling pathway and Wnt pathway. *Socs2*: suppressor of cytokine signaling 2; *Akt1*: Thymoma viral proto-oncogene 1; *Irs2*: insulin receptor substrate 2; *Pik3ca*: phosphatidylinositol 3-kinase, catalytic, alpha polypeptide; *Tcf7l2*: transcription factor 7 like 2; *Wnt5a*: wingless-type MMTV integration site family, member 5A; *Ctnnb1* (catenin, beta 1): catenin (cadherin associated protein), beta 1; *FoxO1*: forkhead box O1; *G6pc*: glucose-6-phosphatase, catalytic, *Ins1*: insulin 1; *Pck2* (*Pepck*): phosphoenolpyruvate carboxykinase 2; *Slc2a4* (*Glut4*): solute carrier family 2 member 4; *Ptpn1* (*Ptp1b*): protein tyrosine phosphatase, non-receptor type 1. Violet lines show experimentally determined interactions. Sky blue lines show known interactions from curated databases. Olive lines show interaction from text mining. Black lines show co-expression interaction.
